# Supplementary material for: Magnetic charge propagation upon a 3D artificial spin-ice
Source: Springer Nature journal article supplement (doi:10.1038/s41467-021-23480-7), 2021-05-28
Supplement: 41467_2021_23480_MOESM1_ESM.pdf [file 41467_2021_23480_MOESM1_ESM.pdf]

# Supplementary Information

## **Magnetic Charge Propagation upon a 3D Artificial Spin-ice**

A. May<sup>1</sup>, M. Saccone<sup>2</sup>, A. van den Berg<sup>1</sup>, J. Askey<sup>1</sup>, M. Hunt<sup>1</sup> and S. Ladak\*<sup>1</sup>

Correspondence to: [ladaks@cardiff.ac.uk](mailto:ladaks@cardiff.ac.uk)

**This PDF file includes:**

Figs. S1 to S12

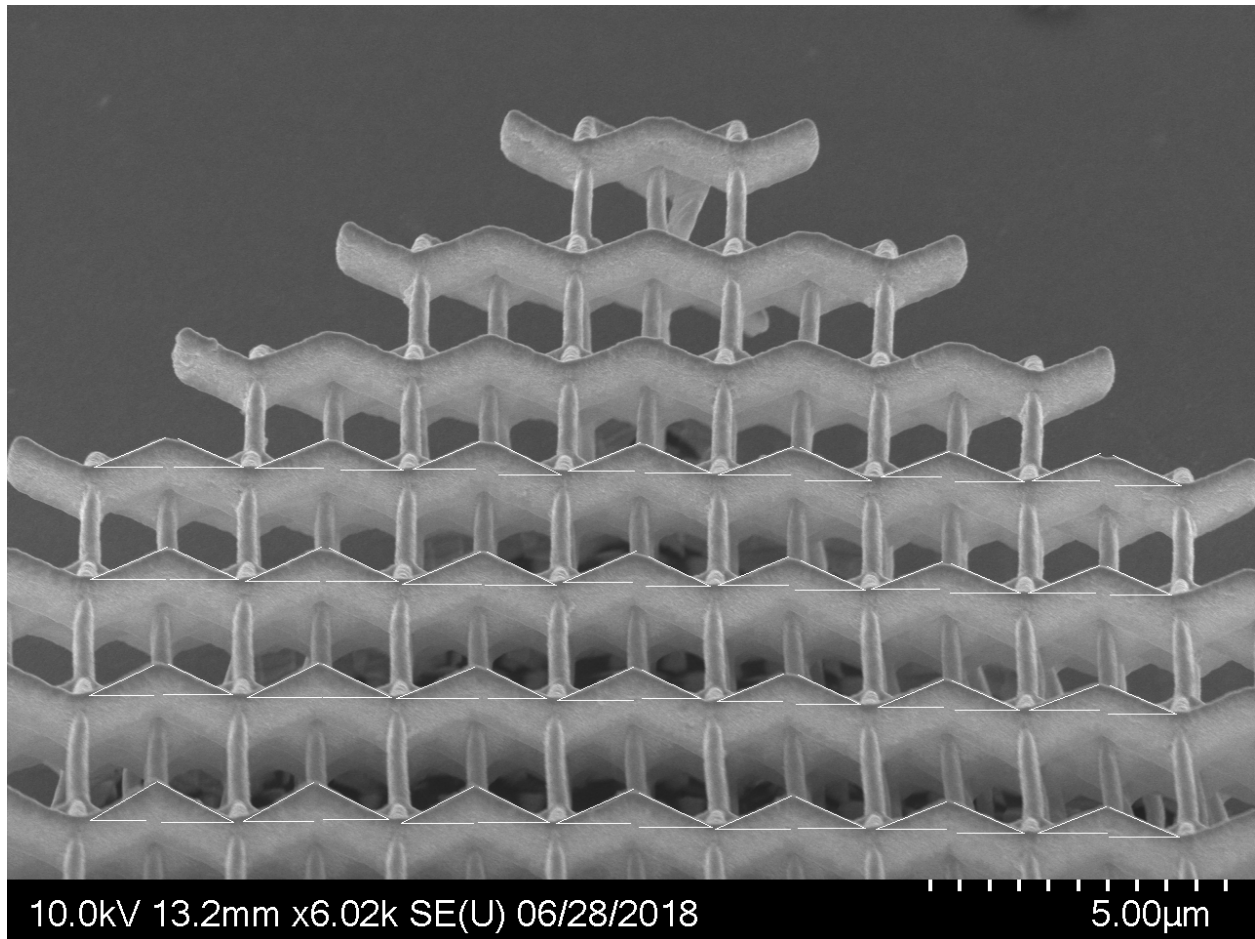

**Supplementary Fig. 1:** SEM image showing 50 measurements of the angle between the L1 wire long-axis and the substrate plane ( $\theta$ ). A simple calculation was required to transform this measured angle into the actual angle, to account for the  $45^\circ$  tilt present during image acquisition.

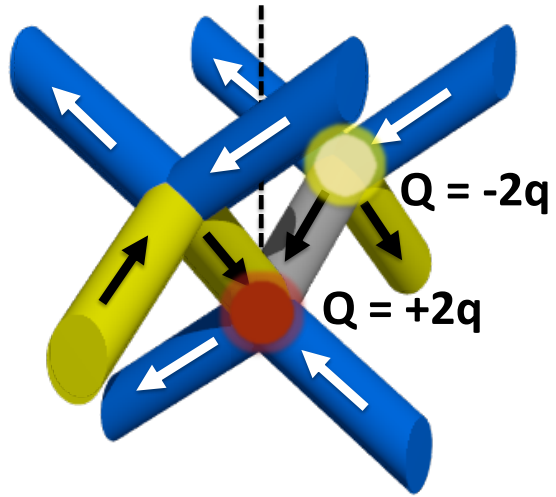

**Supplementary Fig. 2:** A schematic showing the creation of monopoles upon the L2 sub-lattice.

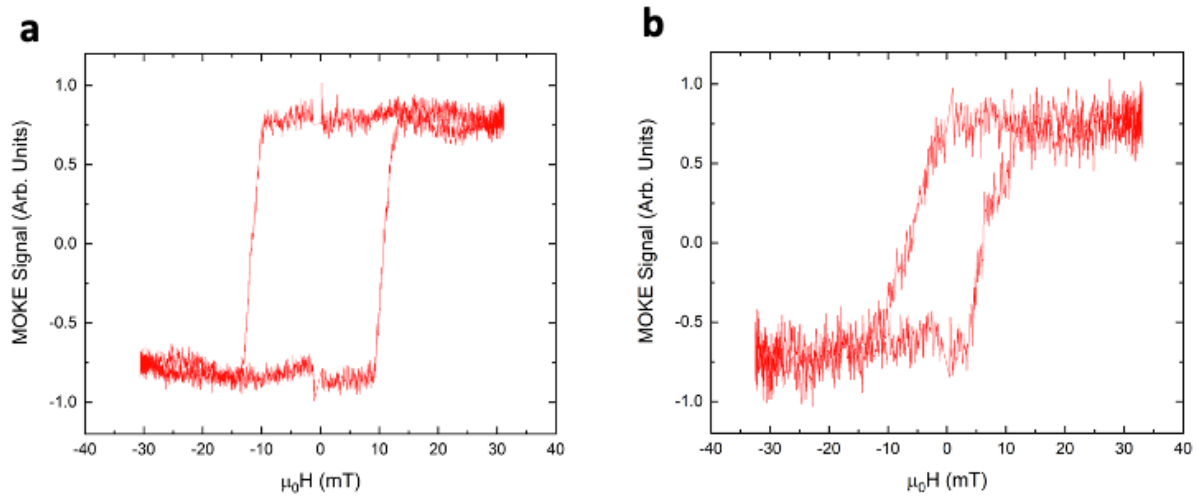

**Supplementary Fig. 3:** Optical magnetometry with external field applied along projection of **(a)** L1 sub-lattice and **(b)** L2 sub-lattice.



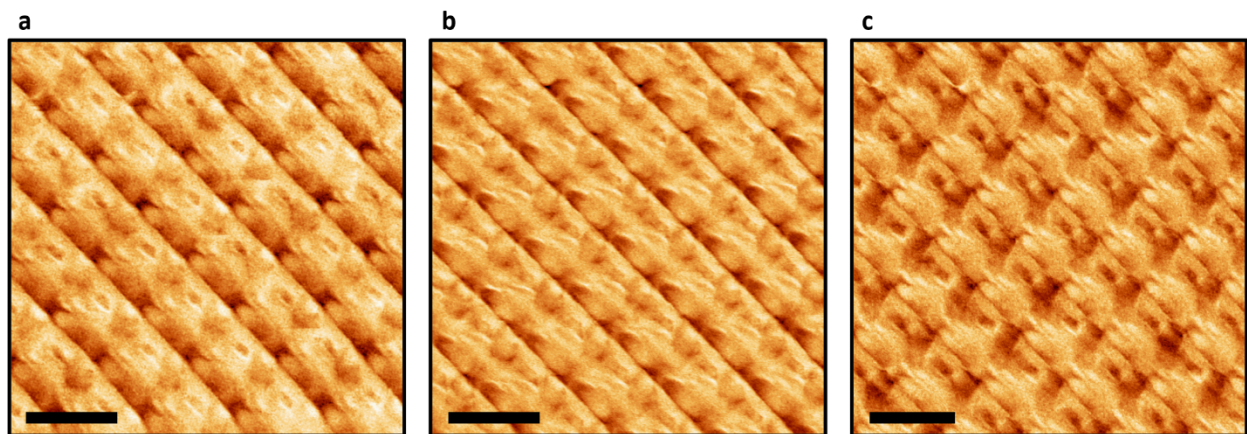

**Supplementary Fig. 4:** Unmasked MFM images of L1 and L2 saturated states. (a) An MFM image taken at remanence after application of saturating fields along the unit vectors  $(1,-1,0)$  and  $(-1,-1,0)$ . (b) MFM image taken at remanence after a further saturating field is now applied along unit vector  $(-1,1,0)$ . (c) MFM image taken at remanence after a further saturating field is now applied along unit vectors  $(1,-1,0)$  and  $(1,1,0)$ . See main text for definition of coordinate system. Scale bars are  $2\mu\text{m}$ .

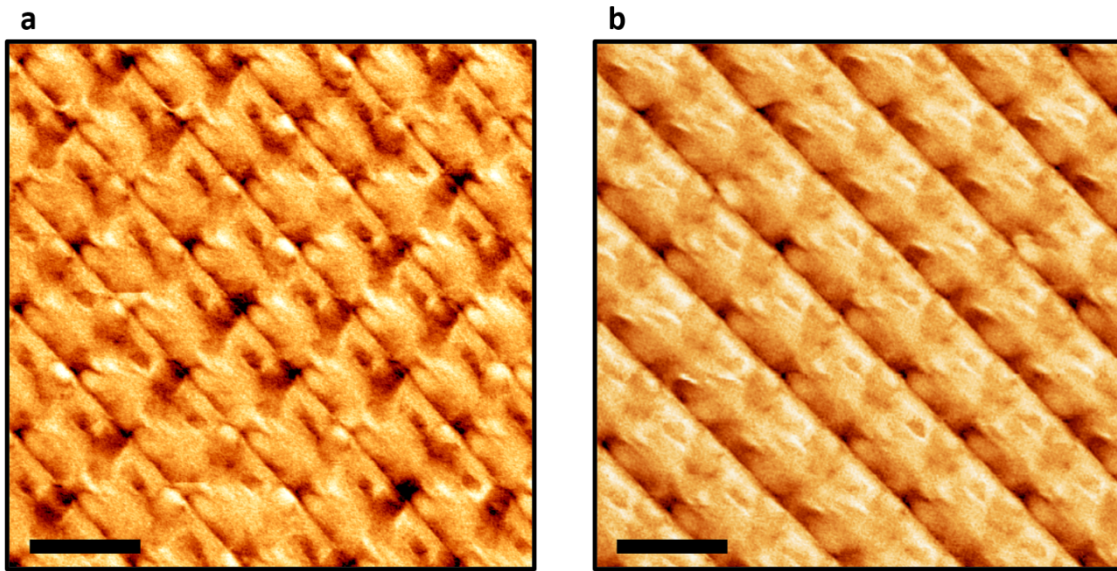

**Supplementary Fig. 5:** Unmasked MFM images of intermediate L1 and L2 states. (a) MFM image taken at remanence following a saturating field along L2, unit vector  $(-1,-1,0)$ , and subsequent 8.0mT field applied along  $(1,1,0)$ . (b) MFM image taken at remanence following a saturating field along L1, the unit vector  $(1,-1,0)$ , and subsequent 9.5mT field along the unit vector  $(-1,1,0)$ . See main text for definition of coordinate system.

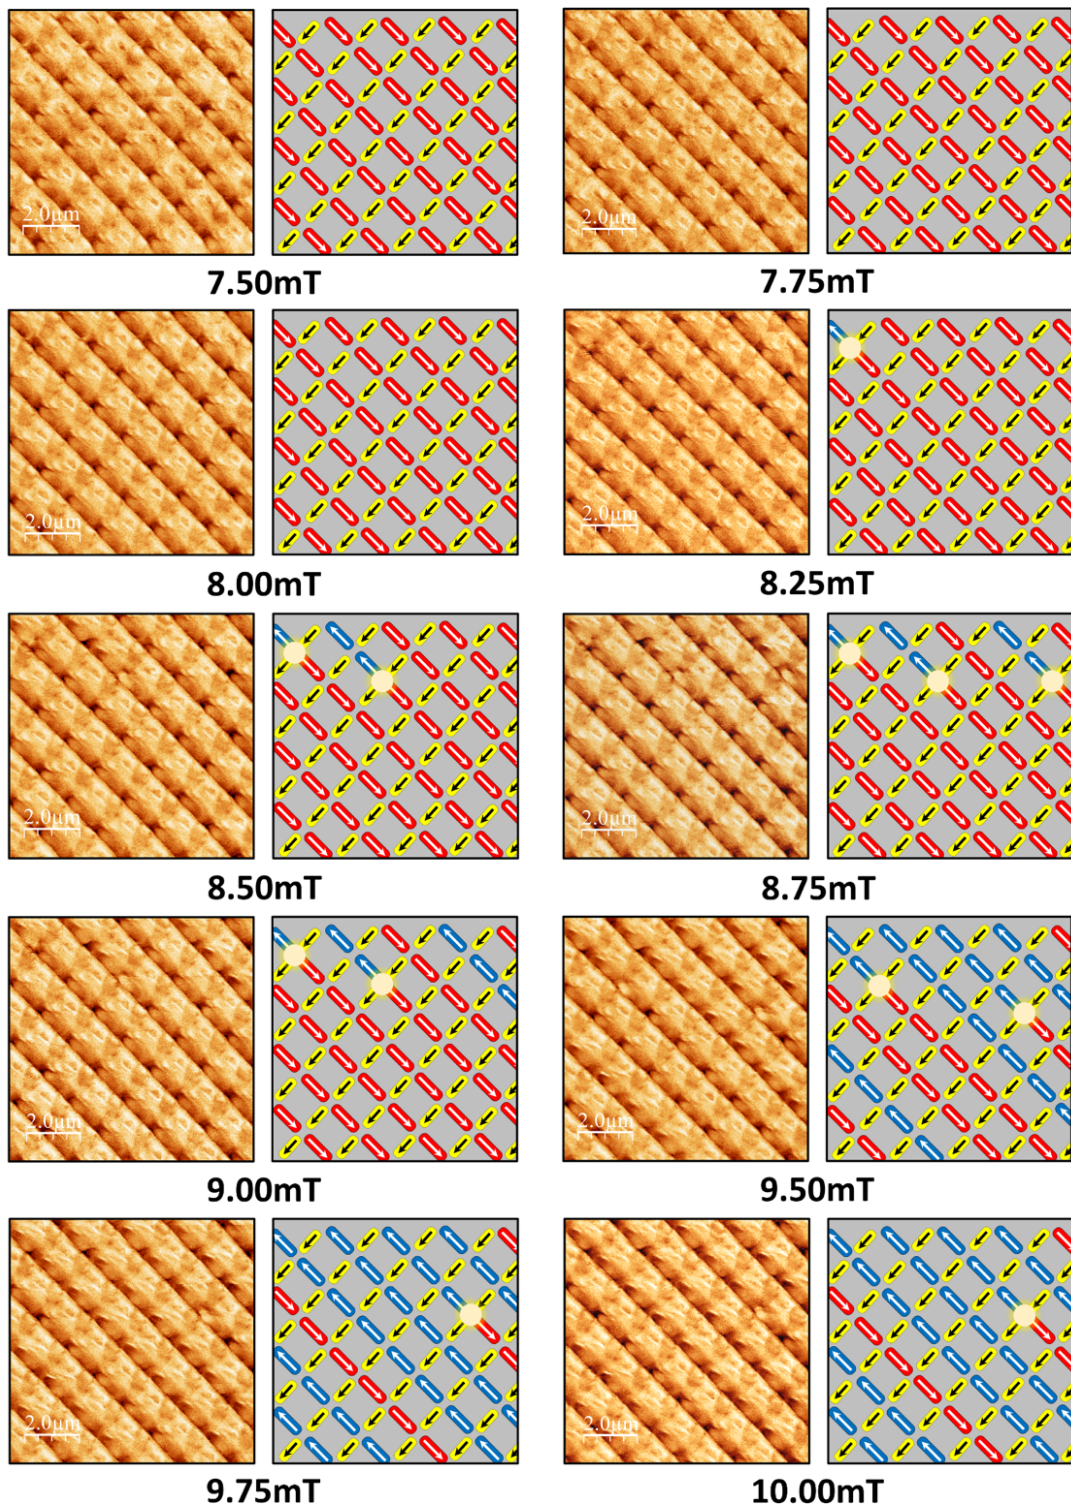

**Supplementary Fig. 6:** Raw MFM data without masks, L1 switching. All scale bars are 2 $\mu$ m.



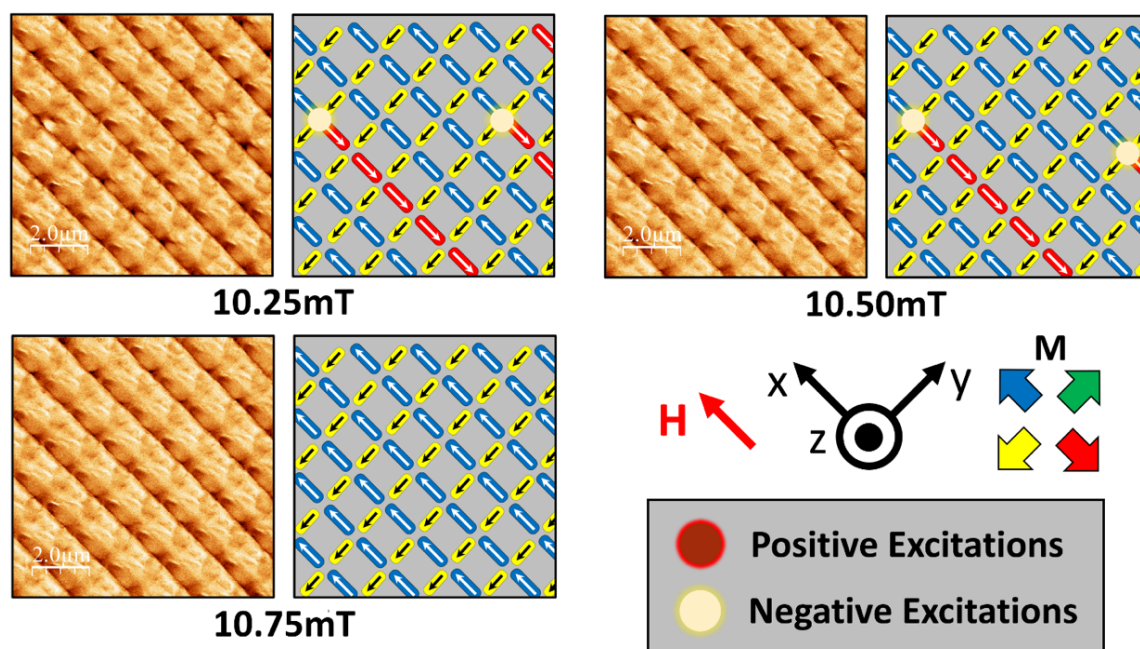

**Supplementary Fig. 6 (continued):** Raw MFM data without masks, L1 switching. All scale bars are 2 μm.

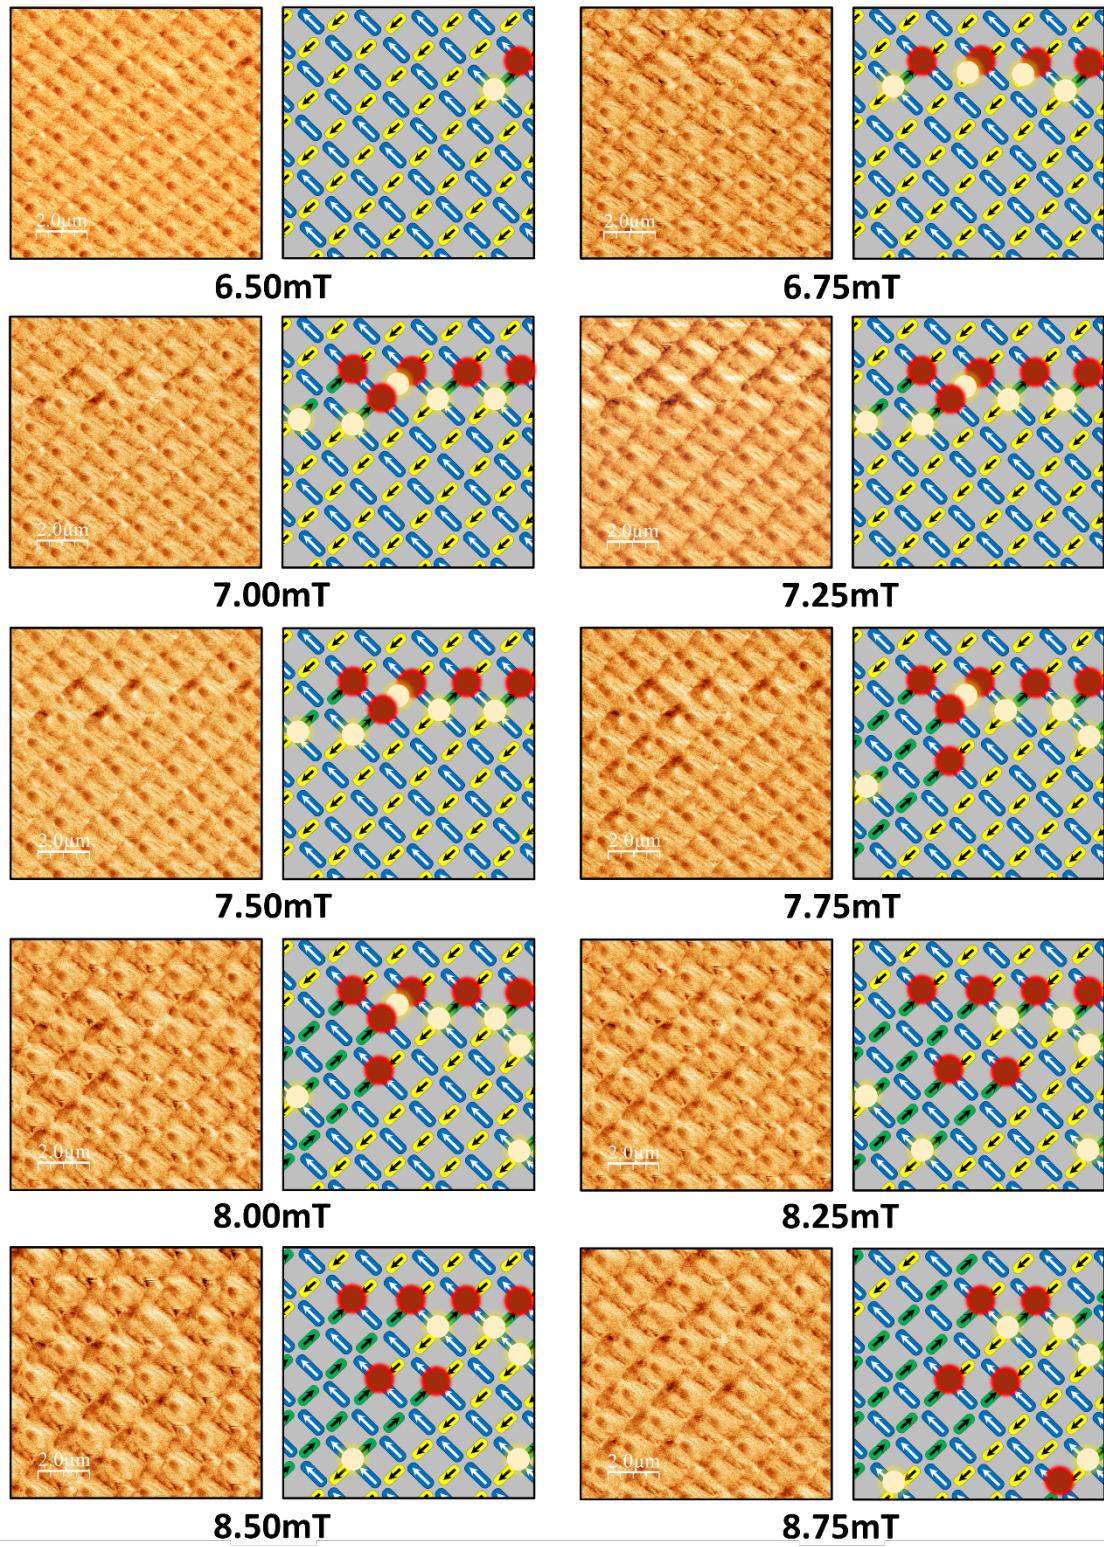

**Supplementary Fig. 7:** Raw MFM data without masks, L2 switching. All scale bars are 2µm.



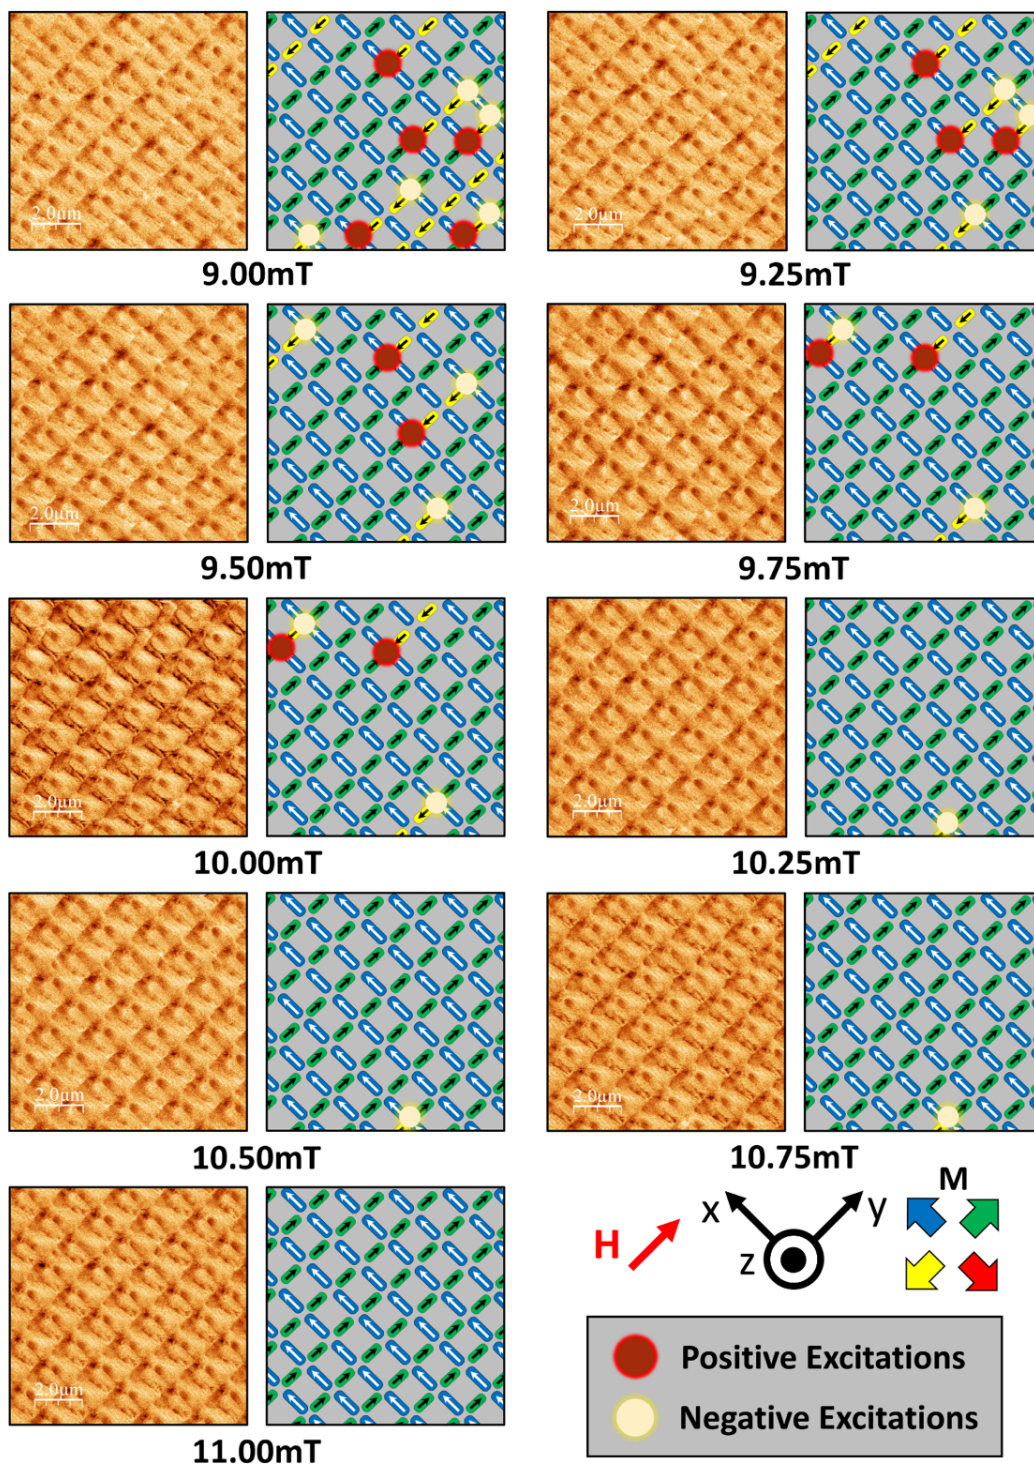

**Supplementary Fig. 7 (continued):** Raw MFM data without masks, L2 switching. All scale bars are 2 $\mu$ m.

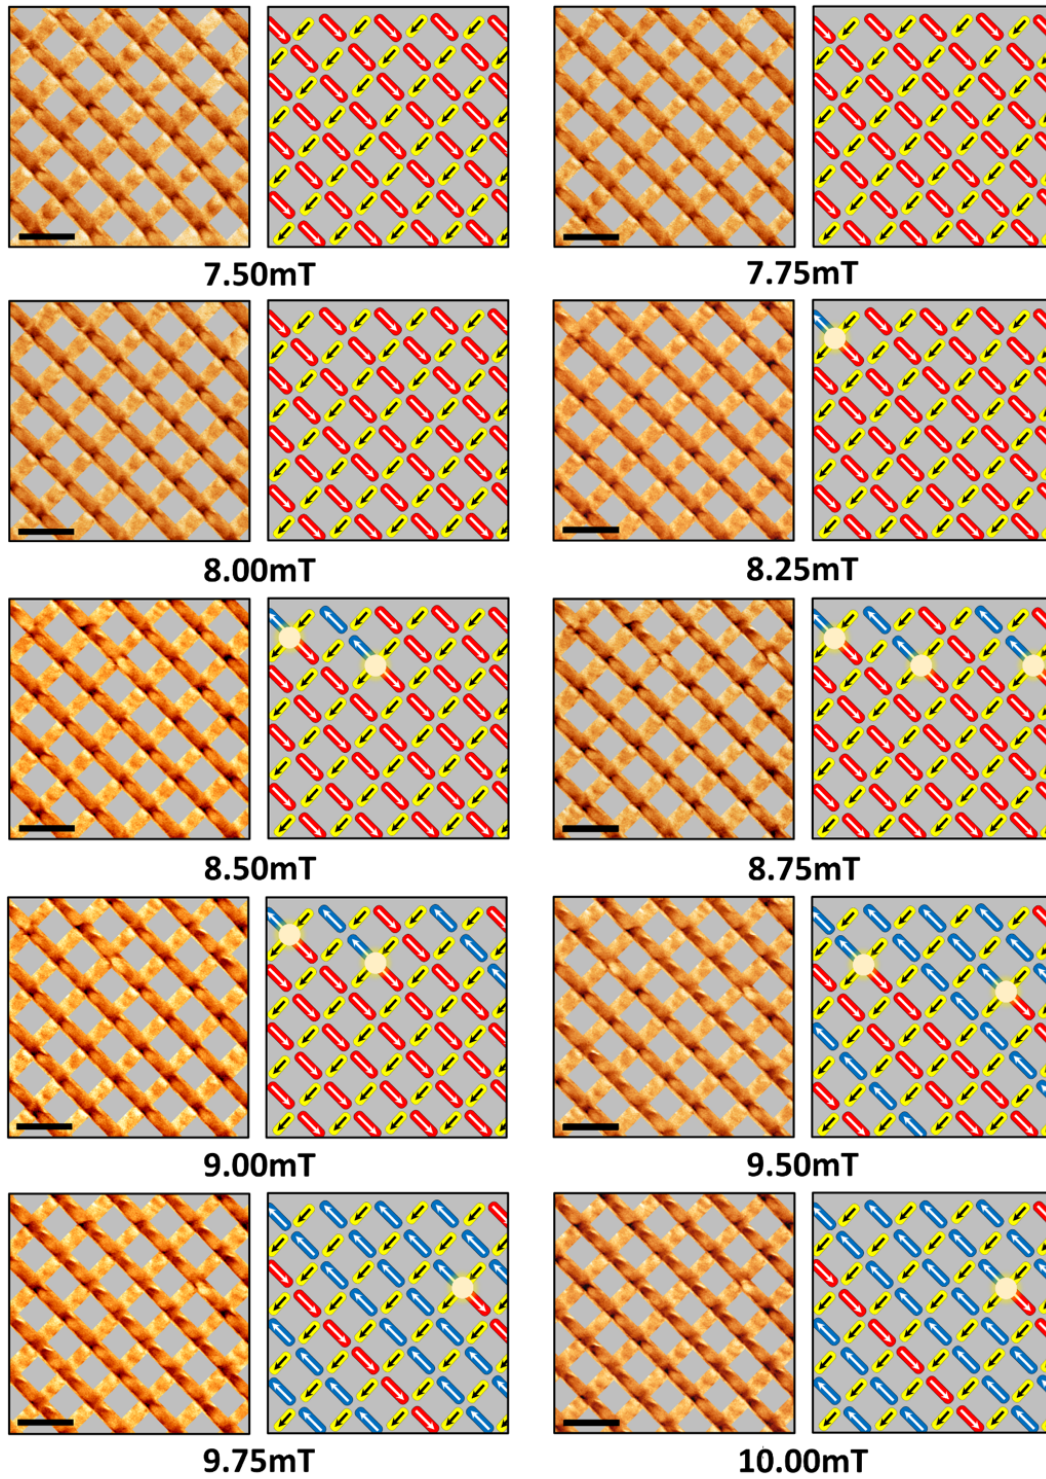

**Supplementary Fig. 8:** Full MFM data with masks, L1 switching. All scale bars are  $2\mu\text{m}$ .



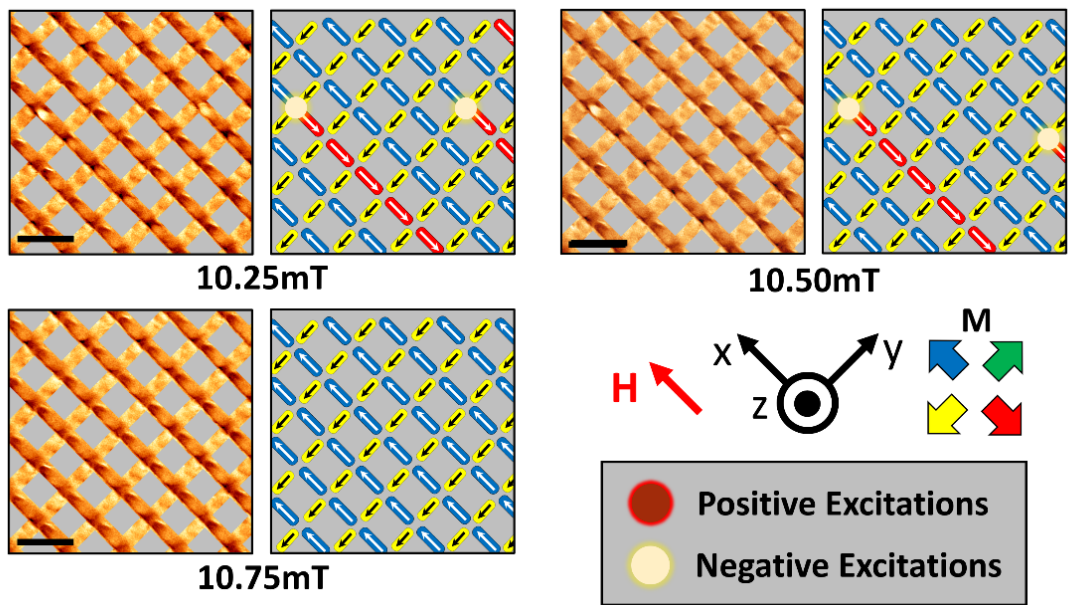

**Supplementary Fig. 8 (continued):** Full MFM data with masks, L1 switching. All scale bars are  $2\mu\text{m}$ .



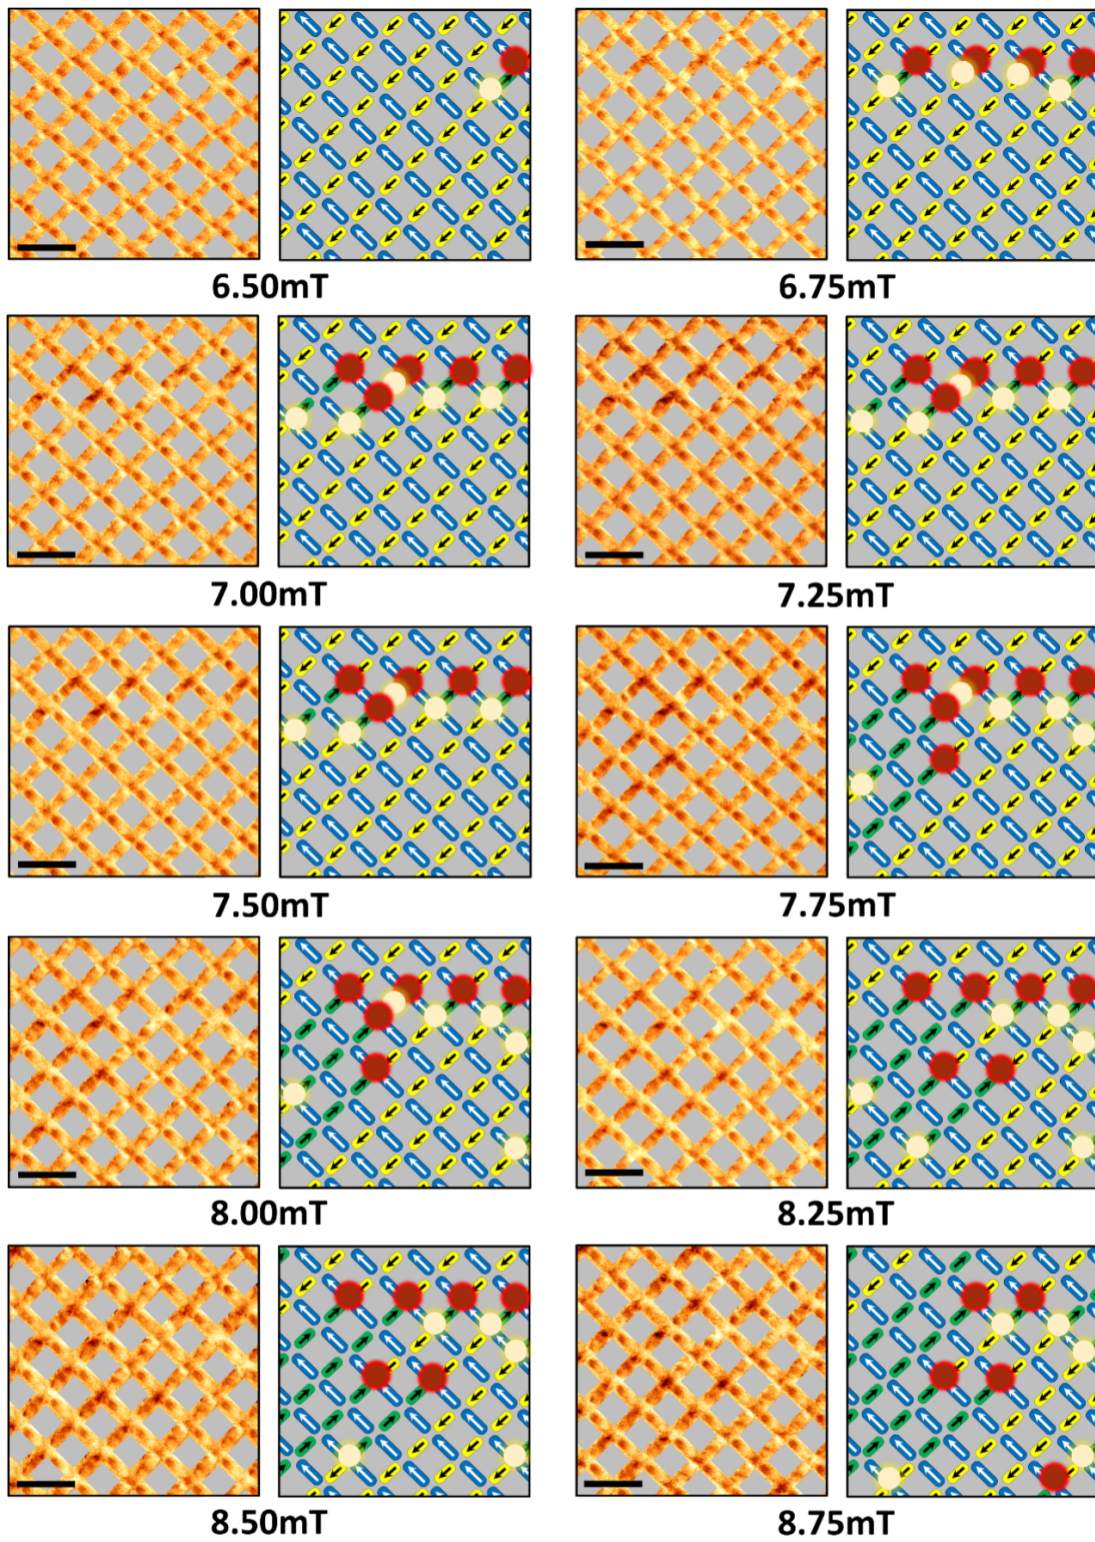

**Supplementary Fig. 9:** Full MFM data with masks, L2 switching. All scale bars are  $2\mu\text{m}$ .

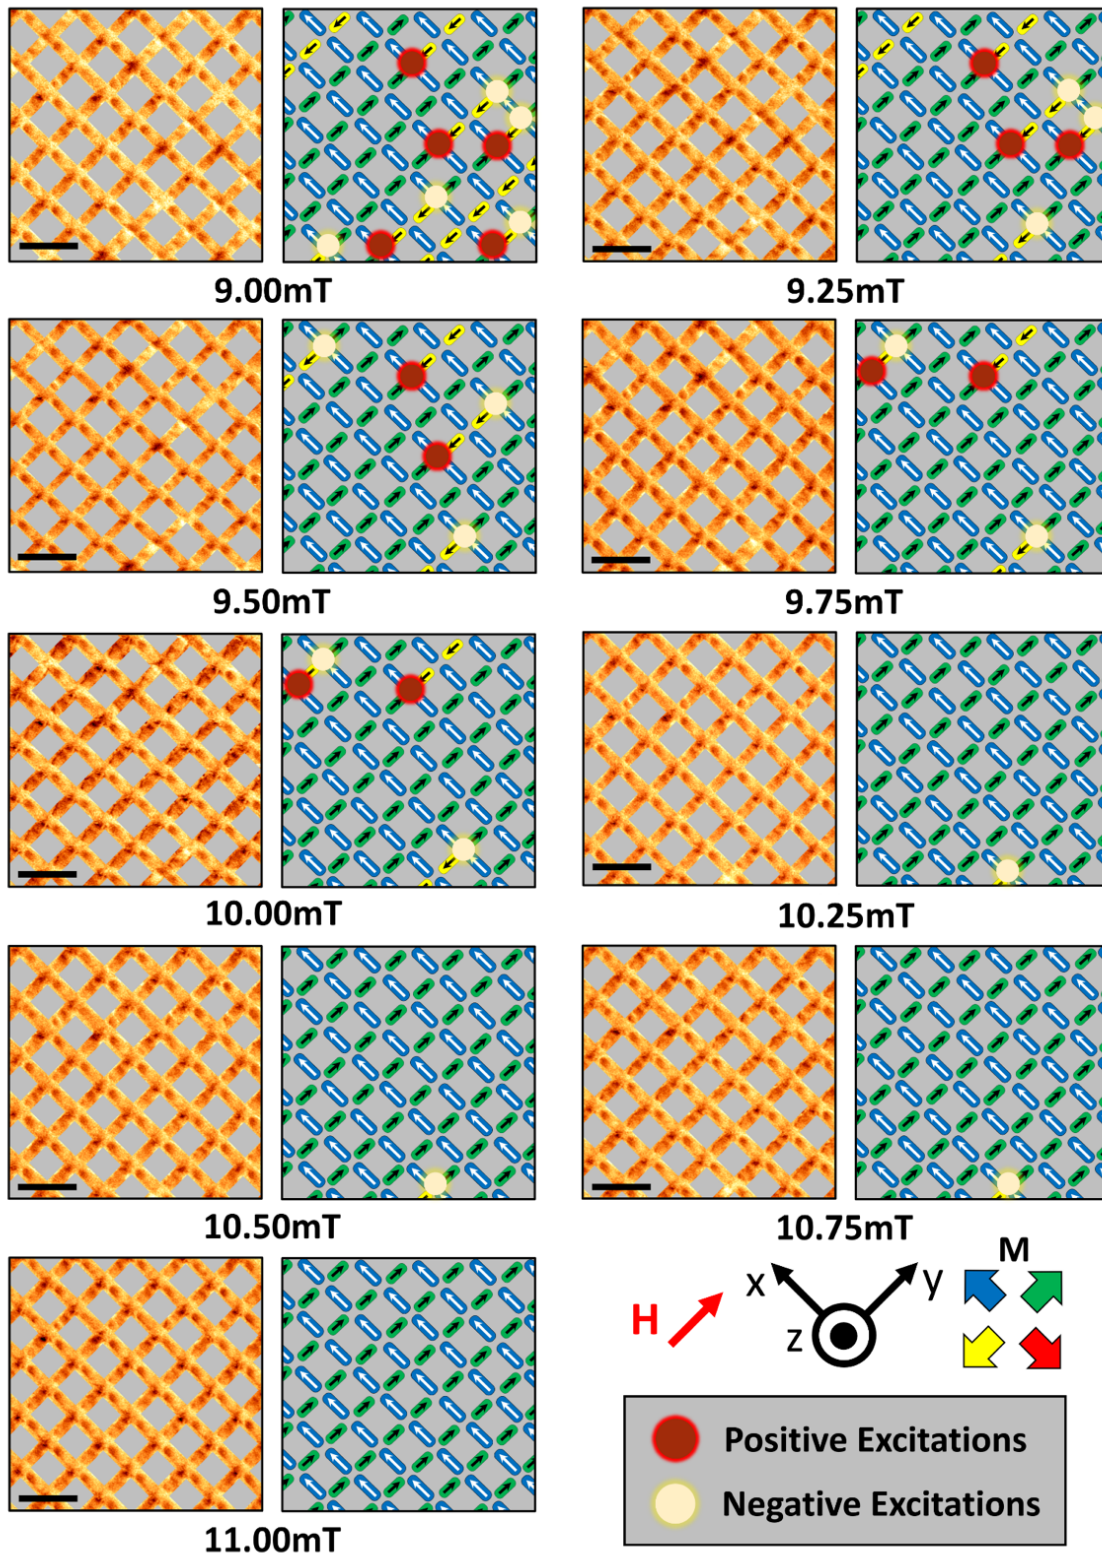

**Supplementary Fig. 9 (continued):** Full MFM data with masks, L2 switching. All scale bars are  $2\mu\text{m}$ .



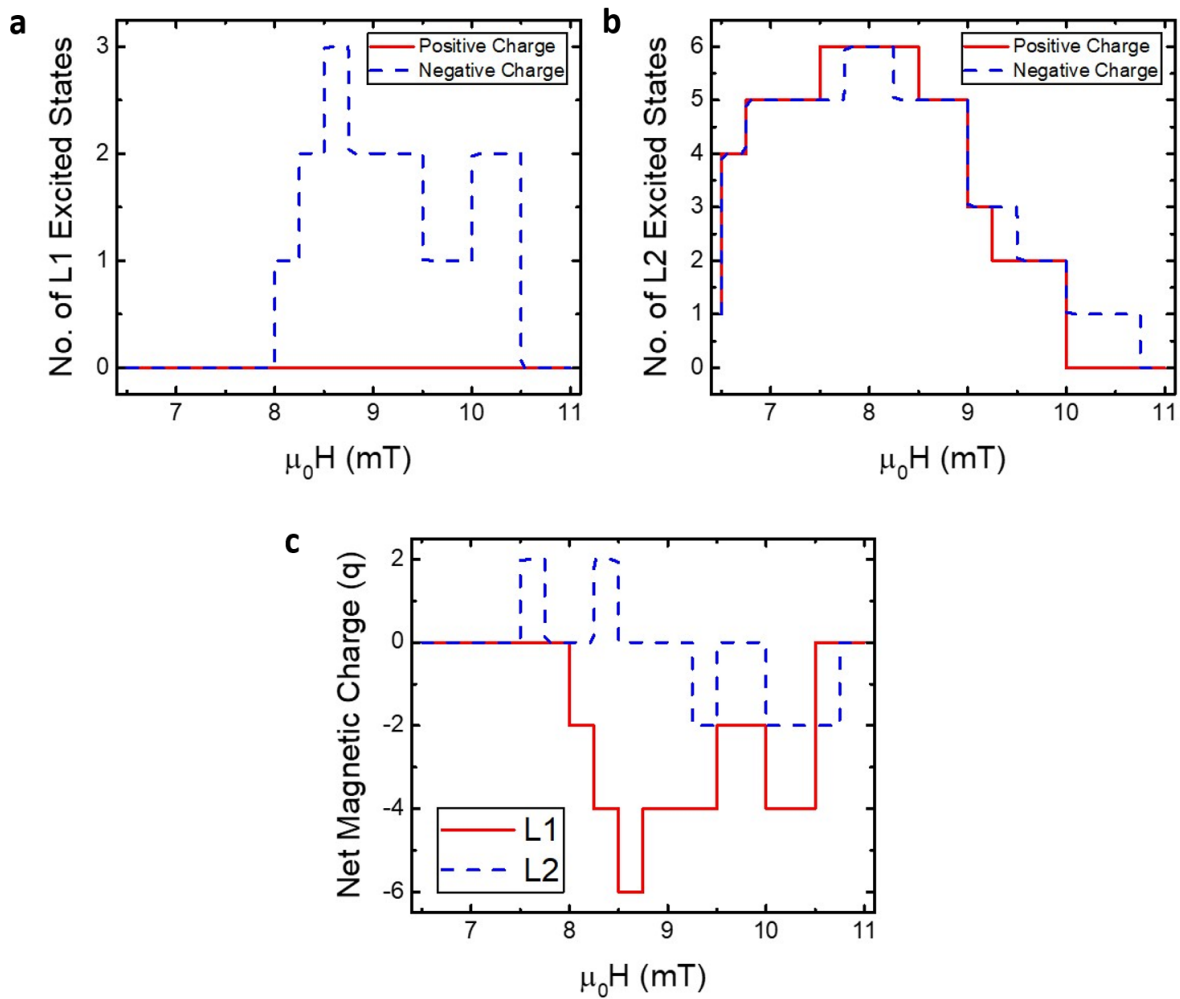

**Supplementary Fig. 10:** Analysis of MFM reversal datasets. **(a)** Number of monopole-excitations as a function of applied field for the L1 switching. Excitations are separated into  $Q = +2q$  (red) and  $Q = -2q$  (blue). **(b)** Equivalent plot for observed monopole-excitations during the L2 reversal. **(c)** Net magnetic charge within the measured window during the L1 (red) and L2 (blue) reversals.

| Vertex Diagram                                                                      | Vertex Type | Energy Density (Jm <sup>-3</sup> ) |
|-------------------------------------------------------------------------------------|-------------|------------------------------------|
|    | 1-in/1-out  | 7021                               |
|    | 2-in        | 16006                              |
|    | 1           | 8342                               |
|    | 2           | 7745                               |
|    | 3           | 9907                               |
|  | 3           | 11276                              |
|  | 3           | 10447                              |
|  | 3           | 11683                              |

**Supplementary Fig. 11:** Vertex energies as calculated using micromagnetic simulations.

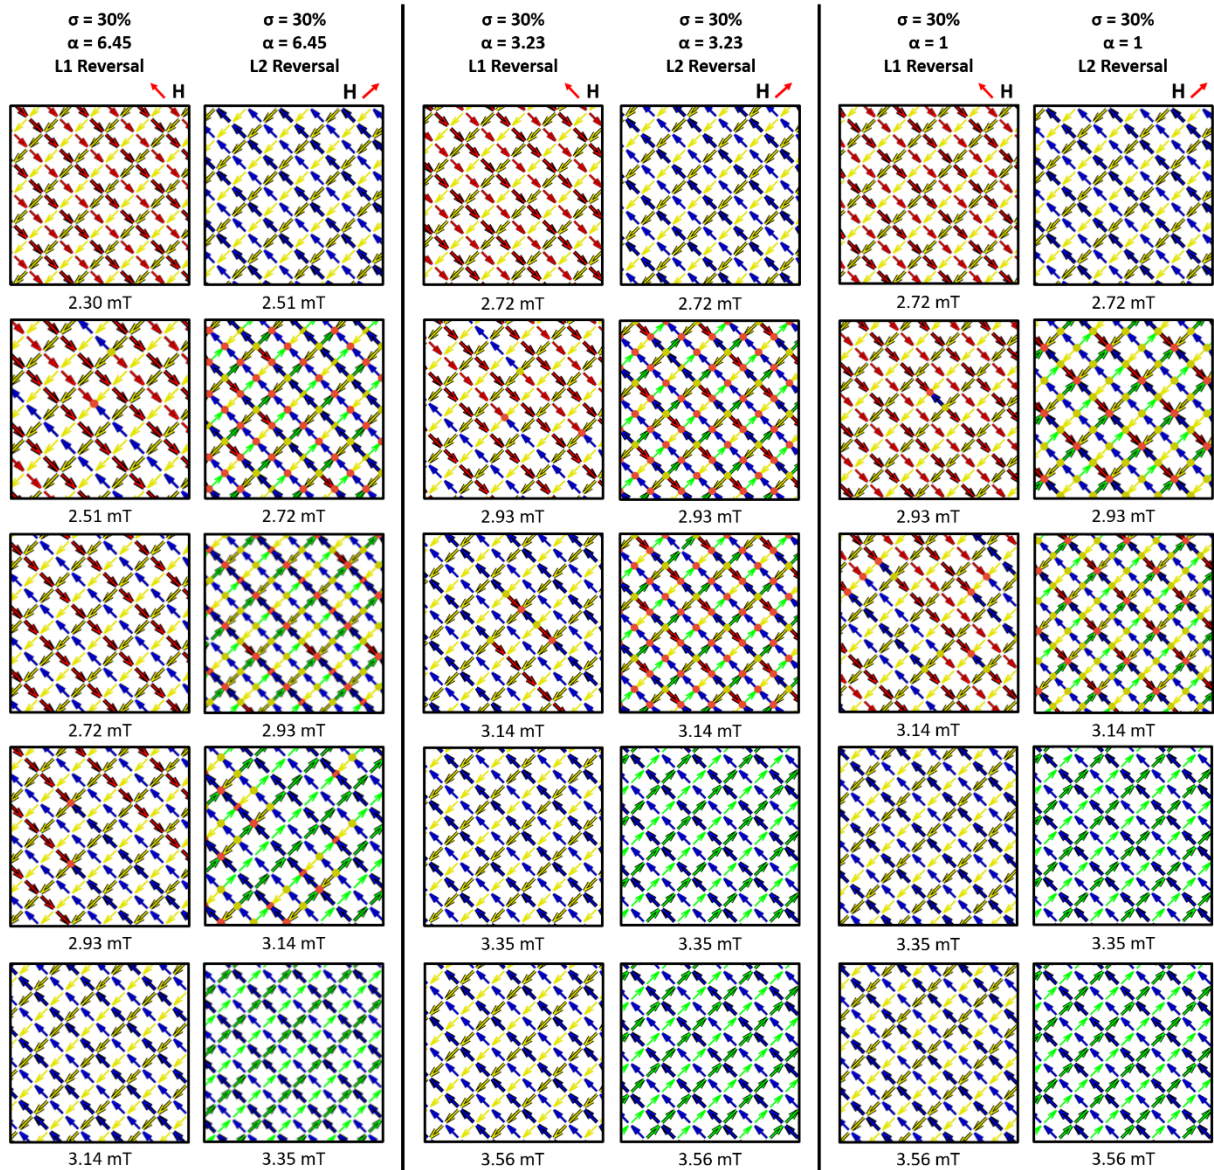

**Supplementary Fig. 12:** Full Monte-Carlo Simulations with varying surface energetics ( $\alpha_{ij}$ ). Micromagnetic simulations indicate  $\alpha_{ij} = 3.23$ , whereas these Monte-Carlo simulations most closely resemble the experimental results when  $\alpha_{ij} = 6.45$ .
